# Supplementary material for: CRISPR-Cas9-mediated pinpoint microbial genome editing aided by target-mismatched sgRNAs
Source: Genome Res. 2020 May;30(5):768–75. doi: 10.1101/gr.257493.119 (PMC7263196; doi:10.1101/gr.257493.119)
Supplement: Supplemental Material [file supp_gr.257493.119_Supplemental_Table_S1.xlsx]

## Sheet: Sheet1
Supplemental Table S1. Strains and plasmids used in galK gene editing-related experiments.
Name	Characteristics	Source/reference
Strain
DH5α	fhuA2 lac(del)U169 phoA glnV44 Φ80' lacZ(del)M15 gyrA96 recA1 relA1 endA1 thi-1 hsdR17	Laboratory stock
MG1655	F− ilvG rfb-50 rph-1	Laboratory stock
HK1059	MG1655, araBAD::PBAD-cas9-KmR	This study
HL001	MG1655, araBAD::PBAD-cas9-KmR, galK (T504A)	This study
HK1164	MG1655, galK (T504A)	This study
Plasmid
pKD46	pSC101 ori ts, araC, λ red genes, AmpR	Laboratory stock
pCas	pSC101 ori ts, cas9 gene, araC, λ red genes, KmR	Addgene #62225
pTargetF	pBR322 ori, sgRNA scaffold, SpR	Addgene #62226
pHK463	pSC101 ori ts, araC, λ bet gene, AmpR	This study
pHL001	pSC101 ori ts, sgRNA scaffold, SpR, AmpR	This study
pHL003	pSC101 ori ts, sgRNA target (498AGGCTGTAACTGCGGGATCA517 in galK), SpR, AmpR	This study
pHL004	pSC101 ori ts, sgRNA target (498AGGCTGTCACTGCGGGATCA517 in galK)*, SpR, AmpR	This study
pHL005	pSC101 ori ts, sgRNA target (498AGGCTGTCCCTGCGGGATCA517 in galK), SpR, AmpR	This study
pHL014	pSC101 ori ts, sgRNA target (498AGGCGCTAACTGCGGGATCA517 in galK), SpR, AmpR	This study
pHL015	pSC101 ori ts, sgRNA target (498AGGCTCTAACTGCGGGATCA517 in galK), SpR, AmpR	This study
pHL017	pSC101 ori ts, sgRNA target (563TGATCGATTGCCGCTCACTG582 in galK), SpR, AmpR	This study
pHL018	pSC101 ori ts, sgRNA target (563TGATCGATTGCCGCTCCCTG582 in galK), SpR, AmpR	This study
pHL019	pSC101 ori ts, sgRNA target (563TGATCGATTGCCGCTCCATG582 in galK), SpR, AmpR	This study
pHL020	pSC101 ori ts, sgRNA target (563TGATCGATTGCCGCGCACTG582 in galK), SpR, AmpR	This study
pHL021	pSC101 ori ts, sgRNA target (563TGATCGATTGCCGAGCACTG582 in galK), SpR, AmpR	This study
*Underlined, target-mismatched base(s) in sgRNA plasmids compared to pHL003 or pHL017.
