# Supplementary material for: CRISPR-Cas9-mediated pinpoint microbial genome editing aided by target-mismatched sgRNAs
Source: Genome Res. 2020 May;30(5):768–75. doi: 10.1101/gr.257493.119 (PMC7263196; doi:10.1101/gr.257493.119)
Supplement: Supplemental Material [file supp_gr.257493.119_Supplemental_Table_S2.xlsx]

## Sheet: Sheet1
Supplemental Table S2. Primers used in strain construction, and galK gene editing related experiments
Name	Sequence (5’→3’)	Description
Cas-AraC-F1	GCTTTTTATCGCAACTCTCTACTGTTTCTCCATACCCGTTTTTTTGGATGGAGTGAAACGATGGATAAGAAATACTCAATAGGCT	Construction of cas9-KmR cassette
KmR-AraD-R4	GTGGTGCCGGTTGCTGGAATCGACTGACCCGCCTGCGCCCAGATGGTGGCGTGGCGCGAGTG TAGGCTGGAGCTGCTTCGAAGTT	Construction of cas9-KmR cassette
Cas-KmR-OR2	GACGGATCCCCGGAATTCAGTCACCTCCTAGCTGACTCAAA	Construction of cas9-KmR cassette
Cas-KmR-OF3	GCTAGGAGGTGACTGAATTCCGGGGATCCGTCGACCTGCAG	Construction of cas9-KmR cassette
Ara-F1	AGCAGCTCCGAATAGCGCCCTTCCCCTTGC	Confirmation of araBAD cassette
AraD_500dn	CCAGCCAGAAGGAGACTTCTGTCCCTTG	Confirmation of araBAD cassette
bet_for	AGGAGGTTATAAAAAATGAGTACTGCACTCGCAACGCTGGC	Amplification of bet gene
bet_rev	TTATCGTGAGGATGCGTCATGCTGCCACCTTCTGCTCTGCGG	Amplification of bet gene
rep101_for	AAGGTGGCAGCATGACGCATCCTCACGATAATATCCGGGTAG	Amplification of pKD46 backbone
ara_promoter_rev	GAGTGCAGTACTCATTTTTTATAACCTCCTTAGAGCTCGAATTC	Amplification of pKD46 backbone
galK504A	GAAAACCAGTTTGTAGGCTGAAACTGCGGGATCATGGATCA	galK 504T to A mutation for stop codon
galK504AT	GAAAACCAGTTTGTAGGCTGATACTGCGGGATCATGGATCA	galK 504TA to AT mutation for stop codon
galK503AGC	GAAAACCAGTTTGTAGGCTAGCACTGCGGGATCATGGATCA	galK 503GTA to AGC mutation for stop codon
galK504ATCA	AAAACCAGTTTGTAGGCTGATCATGCGGGATCATGGATCAG	galK 504TAAC to ATCA mutation for stop codon
galK578A	CTTGCTGATCGATTGCCGCTAACTGGGGACCAAAGCAGTTT	galK 578C to A mutation for stop codon
Sm_ATG_Out	GATACTGGGCCGGCAGGCGCTCCATTGCCC	Construction of sgRNA plasmids
Sm_TAA_Out	GCAATGGAGCGCCTGCCGGCCCAGTATCAG	Construction of sgRNA plasmids
ClaI-gRNA-F	ATCGATAGCGAGTCAGTGAGCGAGGAAGCGGAAG	pHL001 plasmid construction
NcoI-gRNA-R	CCATGGGAAGATCCTTTGATCTTTTCTACGGGGTC	pHL001 plasmid construction
Cas-galK-WF	AGGCTGTAACTGCGGGATCAGTTTTAGAGCTAGAAATAGCAAG	pHL003 plasmid construction
Cas-galK-WR	TGATCCCGCAGTTACAGCCTACTAGTATTATACCTAGGACTG	pHL003 plasmid construction
galK505C_F	AGGCTGTCACTGCGGGATCAGTTTTAGAGCTAGAAATAGCAAG	pHL004 plasmid construction
galK505C_R	TGATCCCGCAGTGACAGCCTACTAGTATTATACCTAGGACTG	pHL004 plasmid construction
galK505CC_F	AGGCTGTCCCTGCGGGATCAGTTTTAGAGCTAGAAATAGCAAG	pHL005 plasmid construction
galK505CC_R	TGATCCCGCAGGGACAGCCTACTAGTATTATACCTAGGACTG	pHL005 plasmid construction
galK502GC_F	AGGCGCTAACTGCGGGATCAGTTTTAGAGCTAGAAATAGCAAG	pHL014 plasmid construction
galK502GC_R	TGATCCCGCAGTTAGCGCCTACTAGTATTATACCTAGGACTG	pHL014 plasmid construction
galK503C_F	AGGCTCTAACTGCGGGATCAGTTTTAGAGCTAGAAATAGCAAG	pHL015 plasmid construction
galK503C_R	TGATCCCGCAGTTAGAGCCTACTAGTATTATACCTAGGACTG	pHL015 plasmid construction
galK563_F	TGATCGATTGCCGCTCACTGGTTTTAGAGCTAGAAATAGCAAG	pHL017 plasmid construction
galK563_R	CAGTGAGCGGCAATCGATCAACTAGTATTATACCTAGGACTG	pHL017 plasmid construction
galK579C_F	TGATCGATTGCCGCTCCCTGGTTTTAGAGCTAGAAATAGCAAG	pHL018 plasmid construction
galK579C_R	CAGGGAGCGGCAATCGATCAACTAGTATTATACCTAGGACTG	pHL018 plasmid construction
galK579CA_F	TGATCGATTGCCGCTCCATGGTTTTAGAGCTAGAAATAGCAAG	pHL019 plasmid construction
galK579CA_R	CATGGAGCGGCAATCGATCAACTAGTATTATACCTAGGACTG	pHL019 plasmid construction
galK577G_F	TGATCGATTGCCGCGCACTGGTTTTAGAGCTAGAAATAGCAAG	pHL020 plasmid construction
galK577G_R	CAGTGCGCGGCAATCGATCAACTAGTATTATACCTAGGACTG	pHL020 plasmid construction
galK576AG_F	TGATCGATTGCCGAGCACTGGTTTTAGAGCTAGAAATAGCAAG	pHL021 plasmid construction
galK576AG_R	CAGTGCTCGGCAATCGATCAACTAGTATTATACCTAGGACTG	pHL021 plasmid construction
