# Supplementary material for: CRISPR-Cas9-mediated pinpoint microbial genome editing aided by target-mismatched sgRNAs
Source: Genome Res. 2020 May;30(5):768–75. doi: 10.1101/gr.257493.119 (PMC7263196; doi:10.1101/gr.257493.119)
Supplement: Supplemental Material [file supp_gr.257493.119_Supplemental_Table_S3.xlsx]

## Sheet: Table S3. Mutagenic oligo
Table S3. Single base-editing oligonucleotides for 16 different genome targets
Base change	Target gene (sequence)	Genome location of oligonucleotide (41mer)	Mutagenic oligonucleotide sequence (5’→3', 41mer)	Transition (Ts) or Transversion (Tv)
A* --> G, T, C	yaaA (TTCCTCCAGCA*ATGGCGAAC)	5,701 <-- 5,741	TTGATGAAGATTCCTCCAGCG*ATGGCGAACTGGTGTTTAAA	Ts
			TTGATGAAGATTCCTCCAGCT*ATGGCGAACTGGTGTTTAAA	Tv
			TTGATGAAGATTCCTCCAGCC*ATGGCGAACTGGTGTTTAAA	Tv
	galK (CGTGCCGCAAA*TTGACACTC)	789,026 <-- 789,066	TCGAAATCACCGTGCCGCAAG*TTGACACTCTGGTAGAAATC	Ts
			TCGAAATCACCGTGCCGCAAT*TTGACACTCTGGTAGAAATC	Tv
			TCGAAATCACCGTGCCGCAAC*TTGACACTCTGGTAGAAATC	Tv
	ybdG (CCACCGTCAAA*GTGCGTAAC)	603,960 <-- 604,000	ATTGGGTTAACCACCGTCAAG*GTGCGTAACTGGGACAATAC	Ts
			ATTGGGTTAACCACCGTCAAT*GTGCGTAACTGGGACAATAC	Tv
			ATTGGGTTAACCACCGTCAAC*GTGCGTAACTGGGACAATAC	Tv
	moeA (GCAGGAGCAGA*CTGAACAAA)	865,996 <-- 866,036	CGGTGGTGATGCAGGAGCAGG*CTGAACAAATGGACAATGGC	Ts
			CGGTGGTGATGCAGGAGCAGT*CTGAACAAATGGACAATGGC	Tv
			CGGTGGTGATGCAGGAGCAGC*CTGAACAAATGGACAATGGC	Tv
T* --> G, A, C	galK (AGGCTGT*AACTGCGGGATCA)	789,456 <-- 789,496	GAAAACCAGTTTGTAGGCTGG*AACTGCGGGATCATGGATCA	Tv
			GAAAACCAGTTTGTAGGCTGA*AACTGCGGGATCATGGATCA	Tv
			GAAAACCAGTTTGTAGGCTGC*AACTGCGGGATCATGGATCA	Ts
	ydcO (ATTTACTGGAT*TGCTGGCAC)	1,505,307 <-- 1,505,347	CATTAATTGTATTTACTGGAG*TGCTGGCACTGGTTTTTTCC	Tv
			CATTAATTGTATTTACTGGAA*TGCTGGCACTGGTTTTTTCC	Tv
			CATTAATTGTATTTACTGGAC*TGCTGGCACTGGTTTTTTCC	Ts
	ydiU (GGCGAACAACT*GCTTGCTGA)	1,790,941 --> 1,790,981 (Reverse complement)	TTGTAGTGCCATCAGCAAGCG*GTTGTTCGCCGAGTAAAATG	Ts
			TTGTAGTGCCATCAGCAAGCT*GTTGTTCGCCGAGTAAAATG	Tv
			TTGTAGTGCCATCAGCAAGCC*GTTGTTCGCCGAGTAAAATG	Tv
	preT (GACCCGCAAGT*CTTTGCTGC)	2,235,136 --> 2,235,176	CCAGACCCGCGACCCGCAAGG*CTTTGCTGCTGGCGATATTG	Tv
			CCAGACCCGCGACCCGCAAGA*CTTTGCTGCTGGCGATATTG	Tv
			CCAGACCCGCGACCCGCAAGC*CTTTGCTGCTGGCGATATTG	Ts
G* --> A, T, C	ypdA (TACTAATACCG*ATCATGTGC)	2,499,398 --> 2,499,438	CGGTGGCGATTACTAATACCA*ATCATGTGCTGGCCTATGTT	Ts
			CGGTGGCGATTACTAATACCT*ATCATGTGCTGGCCTATGTT	Tv
			CGGTGGCGATTACTAATACCC*ATCATGTGCTGGCCTATGTT	Tv
	proX (CTGCCGAATGG*TGCGAATTA)	2,807,851 --> 2,807,891	CGATACCAAACTGCCGAATGA*TGCGAATTATGGCTTCCCGG	Ts
			CGATACCAAACTGCCGAATGT*TGCGAATTATGGCTTCCCGG	Tv
			CGATACCAAACTGCCGAATGC*TGCGAATTATGGCTTCCCGG	Tv
	fau (TGATGAGTACG*GTCAGCGCC)	3,056,590 --> 3,056,630	TGGTCGCCTTTGATGAGTACA*GTCAGCGCCTGGGAATGGGC	Ts
			TGGTCGCCTTTGATGAGTACT*GTCAGCGCCTGGGAATGGGC	Tv
			TGGTCGCCTTTGATGAGTACC*GTCAGCGCCTGGGAATGGGC	Tv
	yhbU (TTGGCAGCGCG*CCGTGGATA)	3,301,702 --> 3,301,742	GTTACGCCCGTTGGCAGCGCA*CCGTGGATATGGCGGCGCAG	Ts
			GTTACGCCCGTTGGCAGCGCT*CCGTGGATATGGCGGCGCAG	Tv
			GTTACGCCCGTTGGCAGCGCC*CCGTGGATATGGCGGCGCAG	Tv
C* --> G, A, T	galK (TGATCGATTGCCGCTC*ACTG)	789,382 <-- 789,422	CTTGCTGATCGATTGCCGCTG*ACTGGGGACCAAAGCAGTTT	Tv
			CTTGCTGATCGATTGCCGCTA*ACTGGGGACCAAAGCAGTTT	Tv
			CTTGCTGATCGATTGCCGCTT*ACTGGGGACCAAAGCAGTTT	Ts
	mnmE (CAGGCCACGCC*TCCGGGACG)	3,886,845 --> 3,886,885	TATCGTAGCCCAGGCCACGCG*TCCGGGACGTGGCGGCGTTG	Tv
			TATCGTAGCCCAGGCCACGCA*TCCGGGACGTGGCGGCGTTG	Tv
			TATCGTAGCCCAGGCCACGCT*TCCGGGACGTGGCGGCGTTG	Ts
	thiH (TCGCATCAAGC*GCAAAACGC)	4,191,545 <-- 4,191,585	CCATGAGTAATCGCATCAAGG*GCAAAACGCTGGATGAAGCG	Tv
			CCATGAGTAATCGCATCAAGA*GCAAAACGCTGGATGAAGCG	Tv
			CCATGAGTAATCGCATCAAGT*GCAAAACGCTGGATGAAGCG	Ts
	yjhF (ACTGTTATCGC*CAGGGAATA)	4,521,510 <-- 4,521,550	CCCCGGCCCGACTGTTATCGG*CAGGGAATATGGCGCTGATG	Tv
			CCCCGGCCCGACTGTTATCGA*CAGGGAATATGGCGCTGATG	Tv
			CCCCGGCCCGACTGTTATCGT*CAGGGAATATGGCGCTGATG	Ts
*Target nucleotides for single base editing
PAM sequences for CRISPR/Cas9 were underlined, and complementary PAM seqeunces were shown in ydiU gene.
48 single base-editings (16 transition and 32 transversion) were designed at 16 genomic targets.
