# Supplementary material for: CRISPR-Cas9-mediated pinpoint microbial genome editing aided by target-mismatched sgRNAs
Source: Genome Res. 2020 May;30(5):768–75. doi: 10.1101/gr.257493.119 (PMC7263196; doi:10.1101/gr.257493.119)
Supplement: Supplemental Material [file supp_gr.257493.119_Supplemental_Table_S4.xlsx]

## Sheet: Table S4 Primers gRNA plasmid
Table S4. Primers used for construction of sgRNA expression plasmids for 16 genomic targets.
Name	Sequence (5’→3')	Description
yaaA729_F	TTCCTCCAGCAATGGCGAACGTTTTAGAGCTAGAAATAGCAAG	pHL047 plasmid construction (target-matched)
yaaA729_R	GTTCGCCATTGCTGGAGGAAACTAGTATTATACCTAGGACTG
yaaA740T_F	TTCCTCCAGCATTGGCGAACGTTTTAGAGCTAGAAATAGCAAG	pHL048 plasmid construction (target-mismatched)
yaaA740T_R	GTTCGCCAATGCTGGAGGAAACTAGTATTATACCTAGGACTG
yaaA740G_F	TTCCTCCAGCAGTGGCGAACGTTTTAGAGCTAGAAATAGCAAG	pHL049 plasmid construction (target-mismatched)
yaaA740G_R	GTTCGCCACTGCTGGAGGAAACTAGTATTATACCTAGGACTG
yaaA740C_F	TTCCTCCAGCACTGGCGAACGTTTTAGAGCTAGAAATAGCAAG	pHL050 plasmid construction (target-mismatched)
yaaA740C_R	GTTCGCCAGTGCTGGAGGAAACTAGTATTATACCTAGGACTG
yaaA_F	ACTCGCACTTTCCCTGGTTCTGGTCG	PCR and sequencing primers for yaaA target
yaaA_R	GCAGGCCGAAACCTTCAGCGAAGACG
ybdG674_F	CCACCGTCAAAGTGCGTAACGTTTTAGAGCTAGAAATAGCAAG	pHL055 plasmid construction (target-matched)
ybdG674_R	GTTACGCACTTTGACGGTGGACTAGTATTATACCTAGGACTG
ybdG685A_F	CCACCGTCAAAATGCGTAACGTTTTAGAGCTAGAAATAGCAAG	pHL056 plasmid construction (target-mismatched)
ybdG685A_R	GTTACGCATTTTGACGGTGGACTAGTATTATACCTAGGACTG
ybdG685T_F	CCACCGTCAAATTGCGTAACGTTTTAGAGCTAGAAATAGCAAG	pHL057 plasmid construction (target-mismatched)
ybdG685T_R	GTTACGCAATTTGACGGTGGACTAGTATTATACCTAGGACTG
ybdG685C_F	CCACCGTCAAACTGCGTAACGTTTTAGAGCTAGAAATAGCAAG	pHL058 plasmid construction (target-mismatched)
ybdG685C_R	GTTACGCAGTTTGACGGTGGACTAGTATTATACCTAGGACTG
ybdG_F	GTGATCGAATATATCAGCCTGAATGC	PCR and sequencing primers for ybdG target
ybdG_R	CTTTTACCCTGCAGGGGATTATCGTC
ydcO744_F	ATTTACTGGATTGCTGGCACGTTTTAGAGCTAGAAATAGCAAG	pHL067 plasmid construction (target-matched)
ydcO744_R	GTGCCAGCAATCCAGTAAATACTAGTATTATACCTAGGACTG
ydcO755A_F	ATTTACTGGATAGCTGGCACGTTTTAGAGCTAGAAATAGCAAG	pHL068 plasmid construction (target-mismatched)
ydcO755A_R	GTGCCAGCTATCCAGTAAATACTAGTATTATACCTAGGACTG
ydcO755G_F	ATTTACTGGATGGCTGGCACGTTTTAGAGCTAGAAATAGCAAG	pHL069 plasmid construction (target-mismatched)
ydcO755G_R	GTGCCAGCCATCCAGTAAATACTAGTATTATACCTAGGACTG
ydcO755C_F	ATTTACTGGATCGCTGGCACGTTTTAGAGCTAGAAATAGCAAG	pHL070 plasmid construction (target-mismatched)
ydcO755C_R	GTGCCAGCGATCCAGTAAATACTAGTATTATACCTAGGACTG
ydcO_F	ACGTAGCAGGGATCCACGTCCTTCAG	PCR and sequencing primers for ydcO target
ydcO_R	GTCACCAACGCGCTAATAGTCCTCTG
ydiU274_F	GGCGAACAACTGCTTGCTGAGTTTTAGAGCTAGAAATAGCAAG	pHL071 plasmid construction (target-matched)
ydiU274_R	TCAGCAAGCAGTTGTTCGCCACTAGTATTATACCTAGGACTG
ydiU285A_F	GGCGAACAACTACTTGCTGAGTTTTAGAGCTAGAAATAGCAAG	pHL072 plasmid construction (target-mismatched)
ydiU285A_R	TCAGCAAGTAGTTGTTCGCCACTAGTATTATACCTAGGACTG
ydiU285T_F	GGCGAACAACTTCTTGCTGAGTTTTAGAGCTAGAAATAGCAAG	pHL073 plasmid construction (target-mismatched)
ydiU285T_R	TCAGCAAGAAGTTGTTCGCCACTAGTATTATACCTAGGACTG
ydiU285C_F	GGCGAACAACTCCTTGCTGAGTTTTAGAGCTAGAAATAGCAAG	pHL074 plasmid construction (target-mismatched)
ydiU285C_R	TCAGCAAGGAGTTGTTCGCCACTAGTATTATACCTAGGACTG
ydiU_F	AGCGACATGTTGTCGGTATTCATCAC	PCR and sequencing primers for ydiU target
ydiU_R	CATTGATACGGCAGAAATATTGGCAC
preT1114_F	GACCCGCAAGTCTTTGCTGCGTTTTAGAGCTAGAAATAGCAAG	pHL075 plasmid construction (target-matched)
preT1114_R	GCAGCAAAGACTTGCGGGTCACTAGTATTATACCTAGGACTG
preT1125A_F	GACCCGCAAGTATTTGCTGCGTTTTAGAGCTAGAAATAGCAAG	pHL076 plasmid construction (target-mismatched)
preT1125A_R	GCAGCAAATACTTGCGGGTCACTAGTATTATACCTAGGACTG
preT1125T_F	GACCCGCAAGTTTTTGCTGCGTTTTAGAGCTAGAAATAGCAAG	pHL077 plasmid construction (target-mismatched)
preT1125T_R	GCAGCAAAAACTTGCGGGTCACTAGTATTATACCTAGGACTG
preT1125G_F	GACCCGCAAGTGTTTGCTGCGTTTTAGAGCTAGAAATAGCAAG	pHL078 plasmid construction (target-mismatched)
preT1125G_R	GCAGCAAACACTTGCGGGTCACTAGTATTATACCTAGGACTG
preT_F	CCGGGCTACCGCTGTTTGAGCATAG	PCR and sequencing primers for preT target
preT_R	AGCTCCTCCCATTGCTGCTCATTTTC
ypdA738_F	TACTAATACCGATCATGTGCGTTTTAGAGCTAGAAATAGCAAG	pHL079 plasmid construction (target-matched)
ypdA738_R	GCACATGATCGGTATTAGTAACTAGTATTATACCTAGGACTG
ypdA749T_F	TACTAATACCGTTCATGTGCGTTTTAGAGCTAGAAATAGCAAG	pHL080 plasmid construction (target-mismatched)
ypdA749T_R	GCACATGAACGGTATTAGTAACTAGTATTATACCTAGGACTG
ypdA749G_F	TACTAATACCGGTCATGTGCGTTTTAGAGCTAGAAATAGCAAG	pHL081 plasmid construction (target-mismatched)
ypdA749G_R	GCACATGACCGGTATTAGTAACTAGTATTATACCTAGGACTG
ypdA749C_F	TACTAATACCGCTCATGTGCGTTTTAGAGCTAGAAATAGCAAG	pHL082 plasmid construction (target-mismatched)
ypdA749C_R	GCACATGAGCGGTATTAGTAACTAGTATTATACCTAGGACTG
ypdA_F	ACCGGCGTGATTGCGGGTATTCACCG	PCR and sequencing primers for ypdA target
ypdA_R	AATTCAATGTTATAGCGCAGATAACG
fau360_F	TGATGAGTACGGTCAGCGCCGTTTTAGAGCTAGAAATAGCAAG	pHL087 plasmid construction (target-matched)
fau360_R	GGCGCTGACCGTACTCATCAACTAGTATTATACCTAGGACTG
fau371A_F	TGATGAGTACGATCAGCGCCGTTTTAGAGCTAGAAATAGCAAG	pHL088 plasmid construction (target-mismatched)
fau371A_R	GGCGCTGATCGTACTCATCAACTAGTATTATACCTAGGACTG
fau371T_F	TGATGAGTACGTTCAGCGCCGTTTTAGAGCTAGAAATAGCAAG	pHL089 plasmid construction (target-mismatched)
fau371T_R	GGCGCTGAACGTACTCATCAACTAGTATTATACCTAGGACTG
fau371C_F	TGATGAGTACGCTCAGCGCCGTTTTAGAGCTAGAAATAGCAAG	pHL090 plasmid construction (target-mismatched)
fau371C_R	GGCGCTGAGCGTACTCATCAACTAGTATTATACCTAGGACTG
fau_F	AGGGTTACAGCCTGCGGCGGCATCTC	PCR and sequencing primers for fau target
fau_R	GCGAGTCTGCTCCAGAAAATAAATC
yhbU228_F	TTGGCAGCGCGCCGTGGATAGTTTTAGAGCTAGAAATAGCAAG	pHL091 plasmid construction (target-matched)
yhbU228_R	TATCCACGGCGCGCTGCCAAACTAGTATTATACCTAGGACTG
yhbU239A_F	TTGGCAGCGCGACGTGGATAGTTTTAGAGCTAGAAATAGCAAG	pHL092 plasmid construction (target-mismatched)
yhbU239A_R	TATCCACGTCGCGCTGCCAAACTAGTATTATACCTAGGACTG
yhbU239T_F	TTGGCAGCGCGTCGTGGATAGTTTTAGAGCTAGAAATAGCAAG	pHL093 plasmid construction (target-mismatched)
yhbU239T_R	TATCCACGACGCGCTGCCAAACTAGTATTATACCTAGGACTG
yhbU239G_F	TTGGCAGCGCGGCGTGGATAGTTTTAGAGCTAGAAATAGCAAG	pHL094 plasmid construction (target-mismatched)
yhbU239G_R	TATCCACGCCGCGCTGCCAAACTAGTATTATACCTAGGACTG
yhbU_F	GCACAATACGGGAACGCAGTTTATCC	PCR and sequencing primers for yhbU target
yhbU_R	CCACCAGATAACGCCCTTTACATAGC
mnmE28_F	CAGGCCACGCCTCCGGGACGGTTTTAGAGCTAGAAATAGCAAG	pHL099 plasmid construction (target-matched)
mnmE28_R	CGTCCCGGAGGCGTGGCCTGACTAGTATTATACCTAGGACTG
mnmE39A_F	CAGGCCACGCCACCGGGACGGTTTTAGAGCTAGAAATAGCAAG	pHL100 plasmid construction (target-mismatched)
mnmE39A_R	CGTCCCGGTGGCGTGGCCTGACTAGTATTATACCTAGGACTG
mnmE39G_F	CAGGCCACGCCGCCGGGACGGTTTTAGAGCTAGAAATAGCAAG	pHL101 plasmid construction (target-mismatched)
mnmE39G_R	CGTCCCGGCGGCGTGGCCTGACTAGTATTATACCTAGGACTG
mnmE39C_F	CAGGCCACGCCCCCGGGACGGTTTTAGAGCTAGAAATAGCAAG	pHL102 plasmid construction (target-mismatched)
mnmE39C_R	CGTCCCGGGGGCGTGGCCTGACTAGTATTATACCTAGGACTG
mnmE_F	ACATGCTGATGGGTTCCGTTGAACTG	PCR and sequencing primers for mnmE target
mnmE_R	TCGACGTAAATGCGCAAGTGGGTGAG
thiH294_F	TCGCATCAAGCGCAAAACGCGTTTTAGAGCTAGAAATAGCAAG	pHL103 plasmid construction (target-matched)
thiH294_R	GCGTTTTGCGCTTGATGCGAACTAGTATTATACCTAGGACTG
thiH305A_F	TCGCATCAAGCACAAAACGCGTTTTAGAGCTAGAAATAGCAAG	pHL104 plasmid construction (target-mismatched)
thiH305A_R	GCGTTTTGTGCTTGATGCGAACTAGTATTATACCTAGGACTG
thiH305T_F	TCGCATCAAGCTCAAAACGCGTTTTAGAGCTAGAAATAGCAAG	pHL105 plasmid construction (target-mismatched)
thiH305T_R	GCGTTTTGAGCTTGATGCGAACTAGTATTATACCTAGGACTG
thiH305C_F	TCGCATCAAGCCCAAAACGCGTTTTAGAGCTAGAAATAGCAAG	pHL106 plasmid construction (target-mismatched)
thiH305C_R	GCGTTTTGGGCTTGATGCGAACTAGTATTATACCTAGGACTG
thiH_F	GGTGTTAGTGAATACGGCGATTGCCG	PCR and sequencing primers for thiH target
thiH_R	GAAAGGAGACAGAGTAACGGCTTTGC
proX730_F	CTGCCGAATGGTGCGAATTAGTTTTAGAGCTAGAAATAGCAAG	pHL115 plasmid construction (target-matched)
proX730_R	TAATTCGCACCATTCGGCAGACTAGTATTATACCTAGGACTG
proX741G_F	CTGCCGAATGGGGCGAATTAGTTTTAGAGCTAGAAATAGCAAG	pHL116 plasmid construction (target-mismatched)
proX741G_R	TAATTCGCCCCATTCGGCAGACTAGTATTATACCTAGGACTG
proX741A_F	CTGCCGAATGGAGCGAATTAGTTTTAGAGCTAGAAATAGCAAG	pHL117 plasmid construction (target-mismatched)
proX741A_R	TAATTCGCTCCATTCGGCAGACTAGTATTATACCTAGGACTG
proX741C_F	CTGCCGAATGGCGCGAATTAGTTTTAGAGCTAGAAATAGCAAG	pHL118 plasmid construction (target-mismatched)
proX741C_R	TAATTCGCGCCATTCGGCAGACTAGTATTATACCTAGGACTG
proX_F	CAAACCCAGCGAAGTAGATTACAACG	PCR and sequencing primers for proX target
proX_R	GTTACGCGCGATGGTGTCGAGCAATG
galK924_F	CGTGCCGCAAATTGACACTCGTTTTAGAGCTAGAAATAGCAAG	pHL119 plasmid construction (target-matched)
galK924_R	GAGTGTCAATTTGCGGCACGACTAGTATTATACCTAGGACTG
galK935G_F	CGTGCCGCAAAGTGACACTCGTTTTAGAGCTAGAAATAGCAAG	pHL120 plasmid construction (target-mismatched)
galK935G_R	GAGTGTCACTTTGCGGCACGACTAGTATTATACCTAGGACTG
galK935A_F	CGTGCCGCAAAATGACACTCGTTTTAGAGCTAGAAATAGCAAG	pHL121 plasmid construction (target-mismatched)
galK935A_R	GAGTGTCATTTTGCGGCACGACTAGTATTATACCTAGGACTG
galK935C_F	CGTGCCGCAAACTGACACTCGTTTTAGAGCTAGAAATAGCAAG	pHL122 plasmid construction (target-mismatched)
galK935C_R	GAGTGTCAGTTTGCGGCACGACTAGTATTATACCTAGGACTG
galK_F	CATCAGCGTGACTACCATCCCTGCGTTG	PCR and sequencing primers for galK (504, 578, and 934) targets
galK_R	CCAGCGAGACCTGACCGCAGAACAGGC
moeA339_F	GCAGGAGCAGACTGAACAAAGTTTTAGAGCTAGAAATAGCAAG	pHL123 plasmid construction (target-matched)
moeA339_R	TTTGTTCAGTCTGCTCCTGCACTAGTATTATACCTAGGACTG
moeA350G_F	GCAGGAGCAGAGTGAACAAAGTTTTAGAGCTAGAAATAGCAAG	pHL124 plasmid construction (target-mismatched)
moeA350G_R	TTTGTTCACTCTGCTCCTGCACTAGTATTATACCTAGGACTG
moeA350A_F	GCAGGAGCAGAATGAACAAAGTTTTAGAGCTAGAAATAGCAAG	pHL125 plasmid construction (target-mismatched)
moeA350A_R	TTTGTTCATTCTGCTCCTGCACTAGTATTATACCTAGGACTG
moeA350T_F	GCAGGAGCAGATTGAACAAAGTTTTAGAGCTAGAAATAGCAAG	pHL126 plasmid construction (target-mismatched)
moeA350T_R	TTTGTTCAATCTGCTCCTGCACTAGTATTATACCTAGGACTG
moeA_F	GACTGCTTTGCCCATAGTATTCGTCC	PCR and sequencing primers for moeA target
moeA_R	CTGAAACCGGGTTGCCCGGCAGGCCG
galK505G_F	AGGCTGTGACTGCGGGATCAGTTTTAGAGCTAGAAATAGCAAG	pHL127 plasmid construction (target-mismatched)
galK505G_R	TGATCCCGCAGTCACAGCCTACTAGTATTATACCTAGGACTG
galK505T_F	AGGCTGTTACTGCGGGATCAGTTTTAGAGCTAGAAATAGCAAG	pHL128 plasmid construction (target-mismatched)
galK505T_R	TGATCCCGCAGTAACAGCCTACTAGTATTATACCTAGGACTG
galK579G_F	TGATCGATTGCCGCTCGCTGGTTTTAGAGCTAGAAATAGCAAG	pHL129 plasmid construction (target-mismatched)
galK579G_R	CAGCGAGCGGCAATCGATCAACTAGTATTATACCTAGGACTG
galK579T_F	TGATCGATTGCCGCTCTCTGGTTTTAGAGCTAGAAATAGCAAG	pHL130 plasmid construction (target-mismatched)
galK579T_R	CAGAGAGCGGCAATCGATCAACTAGTATTATACCTAGGACTG
yjhF481_F	ACTGTTATCGCCAGGGAATAGTTTTAGAGCTAGAAATAGCAAG	pHL131 plasmid construction (target-matched)
yjhF481_R	TATTCCCTGGCGATAACAGTACTAGTATTATACCTAGGACTG
yjhF492G_F	ACTGTTATCGCGAGGGAATAGTTTTAGAGCTAGAAATAGCAAG	pHL132 plasmid construction (target-mismatched)
yjhF492G_R	TATTCCCTCGCGATAACAGTACTAGTATTATACCTAGGACTG
yjhF492A_F	ACTGTTATCGCAAGGGAATAGTTTTAGAGCTAGAAATAGCAAG	pHL133 plasmid construction (target-mismatched)
yjhF492A_R	TATTCCCTTGCGATAACAGTACTAGTATTATACCTAGGACTG
yjhF492T_F	ACTGTTATCGCTAGGGAATAGTTTTAGAGCTAGAAATAGCAAG	pHL134 plasmid construction (target-mismatched)
yjhF492T_R	TATTCCCTAGCGATAACAGTACTAGTATTATACCTAGGACTG
yjhF_F	GACTCTGCATCATTCGTTATTTGCTC	PCR and sequencing primers for yjhF target
yjhF_R	CAGGCCATCAGGATCGGGTTAATATC
