# Supplementary material for: CRISPR-Cas9-mediated pinpoint microbial genome editing aided by target-mismatched sgRNAs
Source: Genome Res. 2020 May;30(5):768–75. doi: 10.1101/gr.257493.119 (PMC7263196; doi:10.1101/gr.257493.119)
Supplement: Supplemental Material [file supp_gr.257493.119_Supplemental_Table_S5.xlsx]

## Sheet: Table S5. sgRNA Plasmid list
Table S5. Plasmids expressing target-matched and single-mismatched sgRNAs for 16 genomic targets
Plasmid	DNA Target (PAM strand)	Non-PAM hybridizing sequence in sgRNA plasmids	Type of sgRNA (T or M)†	base-pairing in DNA-sgRNA duplex
pHL047	yaaA (5,712 <- 5,731) TTCCTCCAGCA*ATGGCGAAC	TTCCTCCAGCAATGGCGAAC	T	T:A	Py:Pu
pHL048		TTCCTCCAGCATTGGCGAAC	M	T:U	Py:Py
pHL049		TTCCTCCAGCAGTGGCGAAC	M	T:G	Py:Pu
pHL050		TTCCTCCAGCACTGGCGAAC	M	T:C	Py:Py
pHL055	ybdG (603,971 <- 603,990) CCACCGTCAAA*GTGCGTAAC	CCACCGTCAAAGTGCGTAAC	T	C:G	Py:Pu
pHL056		CCACCGTCAAAATGCGTAAC	M	C:A	Py:Pu
pHL057		CCACCGTCAAATTGCGTAAC	M	C:U	Py:Py
pHL058		CCACCGTCAAACTGCGTAAC	M	C:C	Py:Py
pHL067	ydcO (1,505,318 <- 1,505,337) ATTTACTGGAT*TGCTGGCAC	ATTTACTGGATTGCTGGCAC	T	A:U	Pu:Py
pHL068		ATTTACTGGATAGCTGGCAC	M	A:A	Pu:Pu
pHL069		ATTTACTGGATGGCTGGCAC	M	A:G	Pu:Pu
pHL070		ATTTACTGGATCGCTGGCAC	M	A:C	Pu:Py
pHL071	ydiU (1,790,952 <- 1,790,971) GGCGAACAACT*GCTTGCTGA	GGCGAACAACTGCTTGCTGA	T	C:G	Py:Pu
pHL072		GGCGAACAACTACTTGCTGA	M	C:A	Py:Pu
pHL073		GGCGAACAACTTCTTGCTGA	M	C:U	Py:Py
pHL074		GGCGAACAACTCCTTGCTGA	M	C:C	Py:Py
pHL075	preT (2,235,146 -> 2,235,165) GACCCGCAAGT*CTTTGCTGC	GACCCGCAAGTCTTTGCTGC	T	G:C	Pu:Py
pHL076		GACCCGCAAGTATTTGCTGC	M	G:A	Pu:Pu
pHL077		GACCCGCAAGTTTTTGCTGC	M	G:U	Pu:Py
pHL078		GACCCGCAAGTGTTTGCTGC	M	G:G	Pu:Pu
pHL079	ypdA (2,499,408 --> 2,499,427) TACTAATACCG*ATCATGTGC	TACTAATACCGATCATGTGC	T	T:A	Py:Pu
pHL080		TACTAATACCGTTCATGTGC	M	T:U	Py:Py
pHL081		TACTAATACCGGTCATGTGC	M	T:G	Py:Pu
pHL082		TACTAATACCGCTCATGTGC	M	T:C	Py:Py
pHL087	fau (3,056,600 -> 3,056,619) TGATGAGTACG*GTCAGCGCC	TGATGAGTACGGTCAGCGCC	T	C:G	Py:Pu
pHL088		TGATGAGTACGATCAGCGCC	M	C:A	Py:Pu
pHL089		TGATGAGTACGTTCAGCGCC	M	C:U	Py:Py
pHL090		TGATGAGTACGCTCAGCGCC	M	C:C	Py:Py
pHL091	yhbU (3,301,712 -> 3,301,731) TTGGCAGCGCG*CCGTGGATA	TTGGCAGCGCGCCGTGGATA	T	G:C	Pu:Py
pHL092		TTGGCAGCGCGACGTGGATA	M	G:A	Pu:Pu
pHL093		TTGGCAGCGCGTCGTGGATA	M	G:U	Pu:Py
pHL094		TTGGCAGCGCGGCGTGGATA	M	G:G	Pu:Pu
pHL099	mnmE (3,886,855 -> 3,886,874) CAGGCCACGCC*TCCGGGACG	CAGGCCACGCCTCCGGGACG	T	A:U	Pu:Py
pHL100		CAGGCCACGCCACCGGGACG	M	A:A	Pu:Pu
pHL101		CAGGCCACGCCGCCGGGACG	M	A:G	Pu:Pu
pHL102		CAGGCCACGCCCCCGGGACG	M	A:C	Pu:Py
pHL103	thiH (4,191,556 <- 4,191,575) TCGCATCAAGC*GCAAAACGC	TCGCATCAAGCGCAAAACGC	T	C:G	Py:Pu
pHL104		TCGCATCAAGCACAAAACGC	M	C:A	Py:Pu
pHL105		TCGCATCAAGCTCAAAACGC	M	C:U	Py:Py
pHL106		TCGCATCAAGCCCAAAACGC	M	C:C	Py:Py
pHL115	proX (2,807,861 -> 2,807,880) CTGCCGAATGG*TGCGAATTA	CTGCCGAATGGTGCGAATTA	T	A:U	Pu:Py
pHL116		CTGCCGAATGGGGCGAATTA	M	A:G	Pu:Pu
pHL117		CTGCCGAATGGAGCGAATTA	M	A:A	Pu:Pu
pHL118		CTGCCGAATGGCGCGAATTA	M	A:C	Pu:Py
pHL119	galK (789,037 <- 789,056) CGTGCCGCAAA*TTGACACTC	CGTGCCGCAAATTGACACTC	T	A:U	Pu:Py
pHL120		CGTGCCGCAAAGTGACACTC	M	A:G	Pu:Pu
pHL121		CGTGCCGCAAAATGACACTC	M	A:A	Pu:Pu
pHL122		CGTGCCGCAAACTGACACTC	M	A:C	Pu:Py
pHL123	moeA (866,007 <- 866,026) GCAGGAGCAGA*CTGAACAAA	GCAGGAGCAGACTGAACAAA	T	G:C	Pu:Py
pHL124		GCAGGAGCAGAGTGAACAAA	M	G:G	Pu:Pu
pHL125		GCAGGAGCAGAATGAACAAA	M	G:A	Pu:Pu
pHL126		GCAGGAGCAGATTGAACAAA	M	G:U	Pu:Py
pHL003	galK (789,463 <- 789,482) AGGCTGT*AACTGCGGGATCA	AGGCTGTAACTGCGGGATCA	T	T:A	Py:Pu
pHL004		AGGCTGTCACTGCGGGATCA	M	T:C	Py:Py
pHL127		AGGCTGTGACTGCGGGATCA	M	T:G	Py:Pu
pHL128		AGGCTGTTACTGCGGGATCA	M	T:U	Py:Py
pHL017	galK (789,398 <- 789,417) TGATCGATTGCCGCTC*ACTG	TGATCGATTGCCGCTCACTG	T	T:A	Py:Pu
pHL018		TGATCGATTGCCGCTCCCTG	M	T:C	Py:Py
pHL129		TGATCGATTGCCGCTCGCTG	M	T:G	Py:Pu
pHL130		TGATCGATTGCCGCTCTCTG	M	T:U	Py:Py
pHL131	yjhF (4,521,521 <- 4,521,540) ACTGTTATCGC*CAGGGAATA	ACTGTTATCGCCAGGGAATA	T	G:C	Pu:Py
pHL132		ACTGTTATCGCGAGGGAATA	M	G:G	Pu:Pu
pHL133		ACTGTTATCGCAAGGGAATA	M	G:A	Pu:Pu
pHL134		ACTGTTATCGCTAGGGAATA	M	G:U	Pu:Py
*Mutation target
†T, target-matched (sixteen sgRNAs); M, single-mismatched (forty eight sgRNAs)
Mismatched bases (immediately next to single base-editing) in sgRNA plasmids involved in paring with bases in non-PAM strands were underlined.
Plasmids carrying pBR322 ori (except pHL003, pHL004, pHL017, and pHL018) in this list are replicating at 37℃.
