# Supplementary material for: CRISPR-Cas9-mediated pinpoint microbial genome editing aided by target-mismatched sgRNAs
Source: Genome Res. 2020 May;30(5):768–75. doi: 10.1101/gr.257493.119 (PMC7263196; doi:10.1101/gr.257493.119)
Supplement: Supplemental Material [file supp_gr.257493.119_Supplemental_Table_S6.xlsx]

## Sheet: Table S6. Mutation Results
Table S6. Genome-wide single base-editings by target-matched and single-mismatched sgRNAs.
Base change	Target gene (sequence)	Genome location	Mutagenic oligonucleotide sequence (5’→3', 41mer)	Transition (T) or Transversion (V)	Mutation	Plasmid	Type of sgRNA	base-pairing in DNA-sgRNA duplex		Success of mutation (n/3)
A* --> G, T, C	yaaA (TTCCTCCAGCA*ATGGCGAAC)	5,701 <-- 5,741	TTGATGAAGATTCCTCCAGCG*ATGGCGAACTGGTGTTTAAA	T	A* --> G	pHL047	T	T:A	Py:Pu	0
						pHL048	M	T:U	Py:Py	0
						pHL049	M	T:G	Py:Pu	0
						pHL050	M	T:C	Py:Py	0
		5,701 <-- 5,741	TTGATGAAGATTCCTCCAGCT*ATGGCGAACTGGTGTTTAAA	V	A* --> T	pHL047	T	T:A	Py:Pu	0
						pHL048	M	T:U	Py:Py	0
						pHL049	M	T:G	Py:Pu	1
						pHL050	M	T:C	Py:Py	0
		5,701 <-- 5,741	TTGATGAAGATTCCTCCAGCC*ATGGCGAACTGGTGTTTAAA	V	A* --> C	pHL047	T	T:A	Py:Pu	0
						pHL048	M	T:U	Py:Py	0
						pHL049	M	T:G	Py:Pu	0
						pHL050	M	T:C	Py:Py	0
	galK (934) (CGTGCCGCAAA*TTGACACTC)	789,026 <-- 789,056	TCGAAATCACCGTGCCGCAAG*TTGACACTCTGGTAGAAATC	T	A* --> G	pHL119	T	A:U	Pu:Py	0
						pHL120	M	A:G	Pu:Pu	0
						pHL121	M	A:A	Pu:Pu	0
						pHL122	M	A:C	Pu:Py	0
		789,026 <-- 789,056	TCGAAATCACCGTGCCGCAAT*TTGACACTCTGGTAGAAATC	V	A* --> T	pHL119	T	A:U	Pu:Py	0
						pHL120	M	A:G	Pu:Pu	0
						pHL121	M	A:A	Pu:Pu	0
						pHL122	M	A:C	Pu:Py	0
		789,026 <-- 789,056	TCGAAATCACCGTGCCGCAAC*TTGACACTCTGGTAGAAATC	V	A* --> C	pHL119	T	A:U	Pu:Py	0
						pHL120	M	A:G	Pu:Pu	0
						pHL121	M	A:A	Pu:Pu	0
						pHL122	M	A:C	Pu:Py	0
	ybdG (CCACCGTCAAA*GTGCGTAAC)	603,960 <-- 604,000	ATTGGGTTAACCACCGTCAAG*GTGCGTAACTGGGACAATAC	T	A* --> G	pHL055	T	C:G	Py:Pu	0
						pHL056	M	C:A	Py:Pu	0
						pHL057	M	C:U	Py:Py	0
						pHL058	M	C:C	Py:Py	0
		603,960 <-- 604,000	ATTGGGTTAACCACCGTCAAT*GTGCGTAACTGGGACAATAC	V	A* --> T	pHL055	T	C:G	Py:Pu	0
						pHL056	M	C:A	Py:Pu	0
						pHL057	M	C:U	Py:Py	0
						pHL058	M	C:C	Py:Py	0
		603,960 <-- 604,000	ATTGGGTTAACCACCGTCAAC*GTGCGTAACTGGGACAATAC	V	A* --> C	pHL055	T	C:G	Py:Pu	0
						pHL056	M	C:A	Py:Pu	2
						pHL057	M	C:U	Py:Py	2
						pHL058	M	C:C	Py:Py	1
	moeA (GCAGGAGCAGA*CTGAACAAA)	865,996 <-- 866,036	CGGTGGTGATGCAGGAGCAGG*CTGAACAAATGGACAATGGC	T	A* --> G	pHL123	T	G:C	Pu:Py	0
						pHL124	M	G:G	Pu:Pu	0
						pHL125	M	G:A	Pu:Pu	1
						pHL126	M	G:U	Pu:Py	0
		865,996 <-- 866,036	CGGTGGTGATGCAGGAGCAGT*CTGAACAAATGGACAATGGC	V	A* --> T	pHL123	T	G:C	Pu:Py	0
						pHL124	M	G:G	Pu:Pu	0
						pHL125	M	G:A	Pu:Pu	0
						pHL126	M	G:U	Pu:Py	0
		865,996 <-- 866,036	CGGTGGTGATGCAGGAGCAGC*CTGAACAAATGGACAATGGC	V	A* --> C	pHL123	T	G:C	Pu:Py	0
						pHL124	M	G:G	Pu:Pu	0
						pHL125	M	G:A	Pu:Pu	2
						pHL126	M	G:U	Pu:Py	1†
T* --> G, A, C	galK (504) (AGGCTGT*AACTGCGGGATCA)	789,456 <-- 789,496	GAAAACCAGTTTGTAGGCTGG*AACTGCGGGATCATGGATCA	V	T* --> G	pHL003	T	T:A	Py:Pu	0
						pHL004	M	T:C	Py:Py	3
						pHL127	M	T:G	Py:Pu	0
						pHL128	M	T:U	Py:Py	ND‡
		789,456 <-- 789,496	GAAAACCAGTTTGTAGGCTGA*AACTGCGGGATCATGGATCA	V	T* --> A	pHL003	T	T:A	Py:Pu	0
						pHL004	M	T:C	Py:Py	3
						pHL127	M	T:G	Py:Pu	0
						pHL128	M	T:U	Py:Py	ND
		789,456 <-- 789,496	GAAAACCAGTTTGTAGGCTGC*AACTGCGGGATCATGGATCA	T	T* --> C	pHL003	T	T:A	Py:Pu	0
						pHL004	M	T:C	Py:Py	0
						pHL127	M	T:G	Py:Pu	0
						pHL128	M	T:U	Py:Py	ND
	ydcO (ATTTACTGGAT*TGCTGGCAC)	1,505,307 <-- 1,505,347	CATTAATTGTATTTACTGGAG*TGCTGGCACTGGTTTTTTCC	V	T* --> G	pHL067	T	A:U	Pu:Py	0
						pHL068	M	A:A	Pu:Pu	1
						pHL069	M	A:G	Pu:Pu	3
						pHL070	M	A:C	Pu:Py	0
		1,505,307 <-- 1,505,347	CATTAATTGTATTTACTGGAA*TGCTGGCACTGGTTTTTTCC	V	T* --> A	pHL067	T	A:U	Pu:Py	0
						pHL068	M	A:A	Pu:Pu	1
						pHL069	M	A:G	Pu:Pu	0
						pHL070	M	A:C	Pu:Py	0
		1,505,307 <-- 1,505,347	CATTAATTGTATTTACTGGAC*TGCTGGCACTGGTTTTTTCC	T	T* --> C	pHL067	T	A:U	Pu:Py	0
						pHL068	M	A:A	Pu:Pu	1
						pHL069	M	A:G	Pu:Pu	0
						pHL070	M	A:C	Pu:Py	0
	ydiU (GGCGAACAACT*GCTTGCTGA)	1,790,941 --> 1,790,981 (Reverse complement)	TTGTAGTGCCATCAGCAAGCG*GTTGTTCGCCGAGTAAAATG	T	T* --> G	pHL071	T	C:G	Py:Pu	0
						pHL072	M	C:A	Py:Pu	2
						pHL073	M	C:U	Py:Py	2
						pHL074	M	C:C	Py:Py	3
		1,790,941 --> 1,790,981 (Reverse complement)	TTGTAGTGCCATCAGCAAGCT*GTTGTTCGCCGAGTAAAATG	V	T* --> A	pHL071	T	C:G	Py:Pu	0
						pHL072	M	C:A	Py:Pu	0
						pHL073	M	C:U	Py:Py	0
						pHL074	M	C:C	Py:Py	0
		1,790,941 --> 1,790,981 (Reverse complement)	TTGTAGTGCCATCAGCAAGCC*GTTGTTCGCCGAGTAAAATG	V	T* --> C	pHL071	T	C:G	Py:Pu	0
						pHL072	M	C:A	Py:Pu	0
						pHL073	M	C:U	Py:Py	0
						pHL074	M	C:C	Py:Py	0
	preT (GACCCGCAAGT*CTTTGCTGC)	2,235,136 --> 2,235,176	CCAGACCCGCGACCCGCAAGG*CTTTGCTGCTGGCGATATTG	V	T* --> G	pHL075	T	G:C	Pu:Py	0
						pHL076	M	G:A	Pu:Pu	0
						pHL077	M	G:U	Pu:Py	0
						pHL078	M	G:G	Pu:Pu	1
		2,235,136 --> 2,235,176	CCAGACCCGCGACCCGCAAGA*CTTTGCTGCTGGCGATATTG	V	T* --> A	pHL075	T	G:C	Pu:Py	0
						pHL076	M	G:A	Pu:Pu	0
						pHL077	M	G:U	Pu:Py	0
						pHL078	M	G:G	Pu:Pu	0
		2,235,136 --> 2,235,176	CCAGACCCGCGACCCGCAAGC*CTTTGCTGCTGGCGATATTG	T	T* --> C	pHL075	T	G:C	Pu:Py	0
						pHL076	M	G:A	Pu:Pu	0
						pHL077	M	G:U	Pu:Py	0
						pHL078	M	G:G	Pu:Pu	0
G* --> A, T, C	ypdA (TACTAATACCG*ATCATGTGC)	2,548,207 --> 2,548,247	AACGTCGAACGGCTTAACCAA*ATGGATCGCTGGATTAGCCA	T	G* --> A	pHL079	T	T:A	Pu:Py	0
						pHL080	M	T:U	Pu:Pu	0
						pHL081	M	T:G	Pu:Py	0
						pHL082	M	T:C	Pu:Pu	0
		2,548,207 --> 2,548,247	AACGTCGAACGGCTTAACCAT*ATGGATCGCTGGATTAGCCA	V	G* --> T	pHL079	T	T:A	Pu:Py	0
						pHL080	M	T:U	Pu:Pu	0
						pHL081	M	T:G	Pu:Py	0
						pHL082	M	T:C	Pu:Pu	0
		2,548,207 --> 2,548,247	AACGTCGAACGGCTTAACCAC*ATGGATCGCTGGATTAGCCA	V	G* --> C	pHL079	T	T:A	Pu:Py	0
						pHL080	M	T:U	Pu:Pu	0
						pHL081	M	T:G	Pu:Py	0
						pHL082	M	T:C	Pu:Pu	0
	proX (CTGCCGAATGG*TGCGAATTA)	2,807,851 --> 2,807,891	CGATACCAAACTGCCGAATGA*TGCGAATTATGGCTTCCCGG	T	G* --> A	pHL115	T	A:U	Pu:Py	0
						pHL116	M	A:G	Pu:Pu	0
						pHL117	M	A:A	Pu:Pu	1
						pHL118	M	A:C	Pu:Py	0
		2,807,851 --> 2,807,891	CGATACCAAACTGCCGAATGT*TGCGAATTATGGCTTCCCGG	V	G* --> T	pHL115	T	A:U	Pu:Py	0
						pHL116	M	A:G	Pu:Pu	0
						pHL117	M	A:A	Pu:Pu	2
						pHL118	M	A:C	Pu:Py	0
		2,807,851 --> 2,807,891	CGATACCAAACTGCCGAATGC*TGCGAATTATGGCTTCCCGG	V	G* --> C	pHL115	T	A:U	Pu:Py	0
						pHL116	M	A:G	Pu:Pu	2
						pHL117	M	A:A	Pu:Pu	2
						pHL118	M	A:C	Pu:Py	1
	fau (TGATGAGTACG*GTCAGCGCC)	3,056,590 --> 3,056,630	TGGTCGCCTTTGATGAGTACA*GTCAGCGCCTGGGAATGGGC	T	G* --> A	pHL087	T	C:G	Py:Pu	0
						pHL088	M	C:A	Py:Pu	0
						pHL089	M	C:U	Py:Py	0
						pHL090	M	C:C	Py:Py	0
		3,056,590 --> 3,056,630	TGGTCGCCTTTGATGAGTACT*GTCAGCGCCTGGGAATGGGC	V	G* --> T	pHL087	T	C:G	Py:Pu	1#
						pHL088	M	C:A	Py:Pu	0
						pHL089	M	C:U	Py:Py	3
						pHL090	M	C:C	Py:Py	2
		3,056,590 --> 3,056,630	TGGTCGCCTTTGATGAGTACC*GTCAGCGCCTGGGAATGGGC	V	G* --> C	pHL087	T	C:G	Py:Pu	0
						pHL088	M	C:A	Py:Pu	0
						pHL089	M	C:U	Py:Py	3
						pHL090	M	C:C	Py:Py	1
	yhbU (TTGGCAGCGCG*CCGTGGATA)	3,301,702 --> 3,301,742	GTTACGCCCGTTGGCAGCGCA*CCGTGGATATGGCGGCGCAG	T	G* --> A	pHL091	T	G:C	Pu:Py	0
						pHL092	M	G:A	Pu:Pu	0
						pHL093	M	G:U	Pu:Py	0
						pHL094	M	G:G	Pu:Pu	0
		3,301,702 --> 3,301,742	GTTACGCCCGTTGGCAGCGCT*CCGTGGATATGGCGGCGCAG	V	G* --> T	pHL091	T	G:C	Pu:Py	0
						pHL092	M	G:A	Pu:Pu	1
						pHL093	M	G:U	Pu:Py	0
						pHL094	M	G:G	Pu:Pu	0
		3,301,702 --> 3,301,742	GTTACGCCCGTTGGCAGCGCC*CCGTGGATATGGCGGCGCAG	V	G* --> C	pHL091	T	G:C	Pu:Py	0
						pHL092	M	G:A	Pu:Pu	1
						pHL093	M	G:U	Pu:Py	0
						pHL094	M	G:G	Pu:Pu	1
C* --> G, A, T	galK (578) (TGATCGATTGCCGCTC*ACTG)	789,382 <-- 789,422	CTTGCTGATCGATTGCCGCTG*ACTGGGGACCAAAGCAGTTT	V	C* --> G	pHL017	T	T:A	Py:Pu	0
						pHL018	M	T:C	Py:Py	0
						pHL129	M	T:G	Py:Pu	ND
						pHL130	M	T:U	Py:Py	0
		789,382 <-- 789,422	CTTGCTGATCGATTGCCGCTA*ACTGGGGACCAAAGCAGTTT	V	C* --> A	pHL017	T	T:A	Py:Pu	0
						pHL018	M	T:C	Py:Py	3
						pHL129	M	T:G	Py:Pu	ND
						pHL130	M	T:U	Py:Py	1
		789,382 <-- 789,422	CTTGCTGATCGATTGCCGCTT*ACTGGGGACCAAAGCAGTTT	T	C* --> T	pHL017	T	T:A	Py:Pu	0
						pHL018	M	T:C	Py:Py	0
						pHL129	M	T:G	Py:Pu	ND
						pHL130	M	T:U	Py:Py	1
	mnmE (CAGGCCACGCC*TCCGGGACG)	3,886,845 --> 3,886,885	TATCGTAGCCCAGGCCACGCG*TCCGGGACGTGGCGGCGTTG	V	C* --> G	pHL099	T	A:U	Pu:Py	0
						pHL100	M	A:A	Pu:Pu	2
						pHL101	M	A:G	Pu:Pu	0
						pHL102	M	A:C	Pu:Py	2
		3,886,845 --> 3,886,885	TATCGTAGCCCAGGCCACGCA*TCCGGGACGTGGCGGCGTTG	V	C* --> A	pHL099	T	A:U	Pu:Py	0
						pHL100	M	A:A	Pu:Pu	3
						pHL101	M	A:G	Pu:Pu	2
						pHL102	M	A:C	Pu:Py	0
		3,886,845 --> 3,886,885	TATCGTAGCCCAGGCCACGCT*TCCGGGACGTGGCGGCGTTG	T	C* --> T	pHL099	T	A:U	Pu:Py	0
						pHL100	M	A:A	Pu:Pu	1
						pHL101	M	A:G	Pu:Pu	0
						pHL102	M	A:C	Pu:Py	0
	thiH (TCGCATCAAGC*GCAAAACGC)	4,191,545 <-- 4,191,585	CCATGAGTAATCGCATCAAGG*GCAAAACGCTGGATGAAGCG	V	C* --> G	pHL103	T	C:G	Py:Pu	0
						pHL104	M	C:A	Py:Pu	0
						pHL105	M	C:U	Py:Py	1
						pHL106	M	C:C	Py:Py	0
		4,191,545 <-- 4,191,585	CCATGAGTAATCGCATCAAGA*GCAAAACGCTGGATGAAGCG	V	C* --> A	pHL103	T	C:G	Py:Pu	0
						pHL104	M	C:A	Py:Pu	1
						pHL105	M	C:U	Py:Py	0
						pHL106	M	C:C	Py:Py	1
		4,191,545 <-- 4,191,585	CCATGAGTAATCGCATCAAGT*GCAAAACGCTGGATGAAGCG	T	C* --> T	pHL103	T	C:G	Py:Pu	0
						pHL104	M	C:A	Py:Pu	0
						pHL105	M	C:U	Py:Py	0
						pHL106	M	C:C	Py:Py	0
	yjhF (ACTGTTATCGC*CAGGGAATA)	4,521,510 <-- 4,521,550	CCCCGGCCCGACTGTTATCGG*CAGGGAATATGGCGCTGATG	V	C* --> G	pHL131	T	G:C	Pu:Py	0
						pHL132	M	G:G	Pu:Pu	0
						pHL133	M	G:A	Pu:Pu	0
						pHL134	M	G:U	Pu:Py	0
		4,521,510 <-- 4,521,550	CCCCGGCCCGACTGTTATCGA*CAGGGAATATGGCGCTGATG	V	C* --> A	pHL131	T	G:C	Pu:Py	0
						pHL132	M	G:G	Pu:Pu	0
						pHL133	M	G:A	Pu:Pu	0
						pHL134	M	G:U	Pu:Py	0
		4,521,510 <-- 4,521,550	CCCCGGCCCGACTGTTATCGT*CAGGGAATATGGCGCTGATG	T	C* --> T	pHL131	T	G:C	Pu:Py	0
						pHL132	M	G:G	Pu:Pu	0
						pHL133	M	G:A	Pu:Pu	0
						pHL134	M	G:U	Pu:Py	0
*Mutation target
†One base editing was successfully obtained using G:U base pairing (between non-PAM strand and sgRNA). There are twelve G:U base parings in the list.
‡ND, not determined. Negative selection was failed, and more than 107 survival colonies (CFU/ug) were calculated.
#Single base-editing was obtained by a target-matched sgRNA.
T or M in types of sgRNA stands for target-matched or single-mismatched, respectively.
25 successful base editings (out of 48 different base changes) were yellow-colored.
41 successful base editings (out of 192 total combinatorial electroporations) were gray-colored.
